# Supplementary material for: Guanidino-aryl derivatives: protonation and structure tuning for spectrophotometric recognition of ds-DNA and ds-RNA
Source: Royal Society of Chemistry journal article supplement (doi:10.1039/d0nj01879a), 2020-01-01
Supplement: d0nj01879a1.pdf [file d0nj01879a1.pdf]

## Supporting Information

### Guanidino-aryl derivatives: protonation and structure tuning for spectrophotometric recognition of ds-DNA and ds-RNA

Mateja Đud<sup>a</sup>, Zoran Glasovac<sup>a</sup>, Davor Margetić<sup>a\*</sup> and Ivo Piantanida<sup>b\*</sup>

<sup>a</sup> *Laboratory for physical organic chemistry, Division of organic chemistry and biochemistry, Ruđer Bošković Institute, Zagreb, Croatia, E-mail: margetid@irb.hr*

<sup>b</sup> *Laboratory for Biomolecular Interactions and Spectroscopy, Division of organic chemistry and biochemistry, Ruđer Bošković Institute, Zagreb, Croatia, E-mail: Ivo.Piantanida@irb.hr*

#### Table of Contents

- I. Structures of studied aryl-guanidines**
- II. Synthesis and Analytical Data of compounds**
- III. Physico-chemical properties of buffered solution**
- IV. Study of interactions with DNA and RNA**
- V. Additional information**
- VI. References**

## I. Structures of studied aryl-guanidines

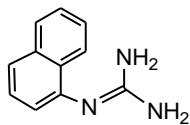

Molecular weight: 185.2251

***N*-(naphthalene-1-yl)guanidine  
(NGU)**

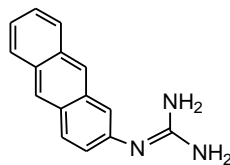

Molecular weight: 235.2838

***N*-(anthracene-2-yl)guanidine  
(AGU)**

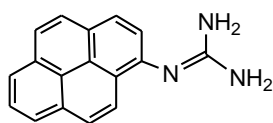

Molecular weight: 259.3052

***N*-(pyrene-1-yl)guanidine  
(PyGU)**

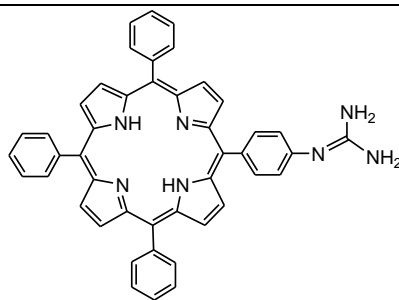

Molecular weight: 671.7904

**5-(*p*-guanidinophenyl)-10,15,20-  
triphenylporphyrin (PoGU)**

Chart S1. Structures of studied aryl-guanidines

## II. Synthesis and Analytical Data of compounds

*N*-(naphthalene-1-yl)guanidine (NGU), *N*-(anthracene-2-yl)guanidine (AGU), *N*-(pyrene-1-yl)guanidine (PyGU) were synthesized as described before.<sup>1</sup>

### 1.1. 5,10,15,20-tetraphenylporphyrin (**3**)

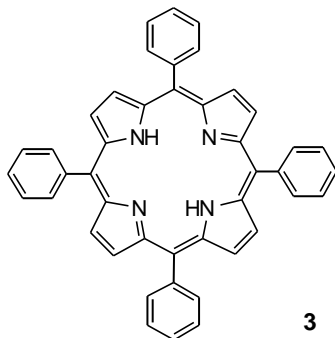

Porphyrin **3** was prepared by literature procedure.<sup>2</sup> To a hot propionic acid (600 mL), benzaldehyde (16.0 mL, 0.16 mol), and pyrrole (11.2 mL, 0.16 mol) were added consecutively. Reaction mixture was refluxed for 30 min. After cooling, the precipitate was filtered off and washed with methanol to give purple crystals. After drying in the air, product **3** was obtained (4.9 g, 20 %). <sup>1</sup>H NMR spectrum is identical to literature.

<sup>1</sup>H NMR (300 MHz, CDCl<sub>3</sub>)  $\delta$ /ppm: 8.85 (s, 8H; H-2, H-3, H-7, H-8, H-12, H-13, H-17, H-18), 8.28 - 8.16 (m, 8H; H-2'), 7.82 - 7.68 (m, 12H; H-3', H-4'), -2.75 (brs, 2H; NH).

### 1.2. 5-(*p*-aminophenyl)-10,15,20-triphenylporphyrin (**5**)

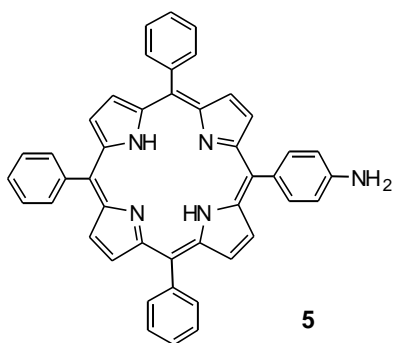

Porphyrin **5** was synthesized from 5,10,15,20-tetraphenylporphyrin **3** in 19-62% yield (depending on the reaction scale), by modification of the literature procedure.<sup>3</sup>

To a solution of 5,10,15,20-tetraphenylporphyrin **3** in TFA, sodium nitrite (0.8 eq) was added. After 5 minutes of stirring at 0 °C, the reaction mixture was poured into distilled water and extracted with dichloromethane. The organic layer was washed with saturated aqueous NaHCO<sub>3</sub> and water. After evaporation of the solvent, the residue was dissolved in concentrated hydrochloric acid and, while stirring, tin(II) chloride (10 eq) was carefully added. The final mixture was heated to 65 °C for 2 hours, before being poured into cold water. The aqueous solution was neutralized with sodium hydroxide until pH = 8. The

aqueous solution was extracted with dichloromethane. The organic layer was then concentrated under vacuum and the residue was purified on the column of silicagel employing a 1:1 mixture of petroleum ether/dichloromethane as the eluent, to give amine **5** as purple solid.

$^1\text{H}$  NMR (300 MHz,  $\text{CDCl}_3$ )  $\delta$ /ppm: 8.94 (d,  $J = 4.8$  Hz, 2H; H-3, H-7), 8.83 (s, 6H; H-2, H-8, H-12, H-13, H-17, H-18), 8.29-8.16 (m, 6H; H-6'), 8.00 (d,  $J = 8.3$  Hz, 2H; H-2'), 7.83-7.67 (m, 9H; H-7', H-8'), 7.07 (d,  $J = 8.4$  Hz, 2H; H-3'), 4.03 (brs, 2H;  $\text{NH}_2$ ), -2.75 (brs, 2H; NH).

**1.3.  $N,N'$ -di-Boc- $N''$ -trifluoromethanesulfonyl-guanidine** was synthesized in two steps from guanidine hydrochloride in 33% yield, following the literature procedure.<sup>4</sup>

$^1\text{H}$  NMR (600 MHz,  $d_6$ -DMSO)  $\delta$ /ppm: 11.03 (brs, 2H), 1.46 (s, 18H).

### 1.3. **5-( $p$ -guanidinophenyl)-10,15,20-triphenylporphyrin (PoGU) (**6**)**

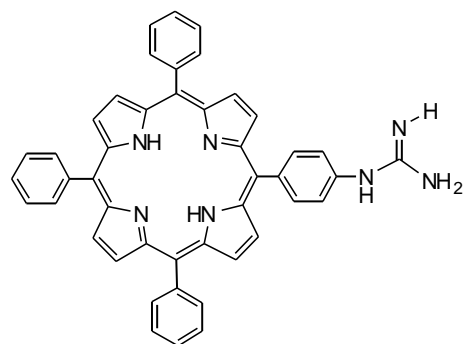

**PoGu**

To a solution of  $N,N'$ -di-Boc- $N''$ -trifluoromethanesulfonyl-guanidine (198.9 mg, 0.5082 mmol) and trimethylamine (75.0  $\mu\text{L}$ , 0.5336 mmol) in dichloromethane (3 mL), 5-( $p$ -aminophenyl)-10,15,20-triphenylporphyrin **5** (160.0 mg, 0.2541 mmol) was added and the reaction mixture was stirred at r.t. for 15 days, until the complete consumption of amine (followed by TLC). After the evaporation of solvent, reaction mixture was subjected to chromatography on the column of silicagel employing a 1:1 mixture of petroleum ether/dichloromethane as the eluent. The obtained solid (246.0 mg), containing 5-[( $N^1,N^2$ -bis(*tert*-butoxycarbonyl)- $p$ -guanidinophenyl)]-10,15,20-triphenylporphyrin **6** as desired product, contaminated with the excess of  $N,N'$ -di-Boc- $N''$ -trifluoromethanesulfonyl-guanidine, was hydrolysed in the next step without further purification. 50.0 mg (0.0573 mmol) of the above mentioned solid, composed mainly of  $N,N'$ -di-Boc-protected guanidine, was suspended in methanol and excess of hydrochloric acid was added. The reaction mixture was stirred at r.t. for several hours, until the full consumption of substrate (monitored by TLC). Reaction mixture was basified with saturated aqueous solution of potassium hydroxide and stirred at r.t. for several hours. Methanol was removed under reduced pressure and residue was extracted with ethyl acetate. Organic extracts were collected, dried

over  $\text{MgSO}_4$  and solvent was removed under reduced pressure to afford neutral **PoGU** as a purple solid (30.1 mg, 78% yield).

FTIR-ATR  $\tilde{\nu}/\text{cm}^{-1}$ : 3463, 3318, 3023, 1657, 1590, 1471, 1440, 1349, 1174, 1071, 1001, 965, 800, 734, 701.

$^1\text{H}$  NMR (300 MHz,  $d_6$ -DMSO)  $\delta/\text{ppm}$ : 9.04 (d,  $J = 4.8$  Hz, 2H; H-3, H-7), 8.87-8.76 (m, 6H; H-2, H-8, H-12, H-13, H-17, H-18), 8.27-8.18 (m, 6H; H-6'), 8.00 (d,  $J = 8.2$  Hz, 2H; H-2'), 7.89-7.78 (m, 9H; H-7', H-8'), 7.19 (d,  $J = 6.6$  Hz, 2H; H-3'), 5.39 (brs, 4H; 2  $\text{NH}_2$ ), -2.87 (s, 2H; 2  $\text{NH}_{\text{pyrrole}}$ ).

$^{13}\text{C}$  NMR (75 MHz,  $\text{CDCl}_3$ )  $\delta/\text{ppm}$ : 151,1 (C=N); 148,7; 142,2; 136,1; 135,8; 134,5; 127,6; 126,6; 121,3; 120,4; 119,9; 119,8.

HRMS-MALDI found: 672.2891; calc. for  $\text{C}_{45}\text{H}_{33}\text{N}_7$   $[\text{M}+\text{H}]^+$ : 672.2876.

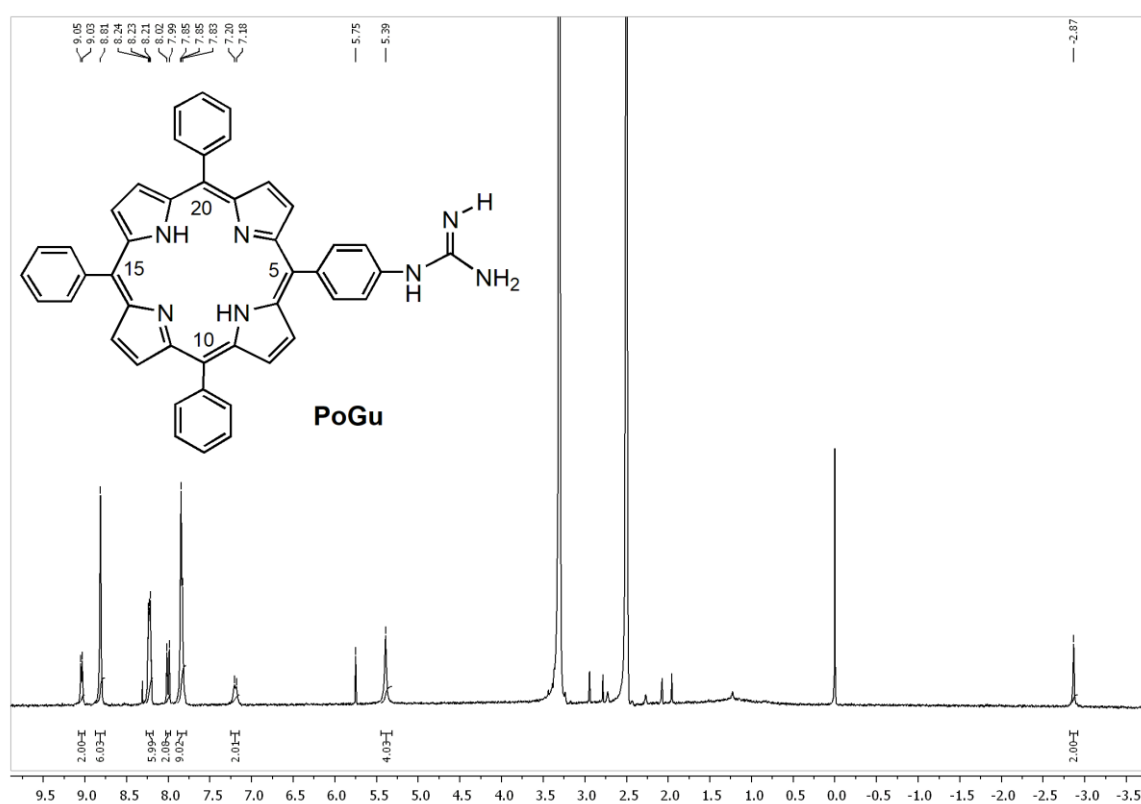

Figure S1.  $^1\text{H}$  NMR (300 MHz,  $\text{CDCl}_3$ ) spectrum of **PoGU**

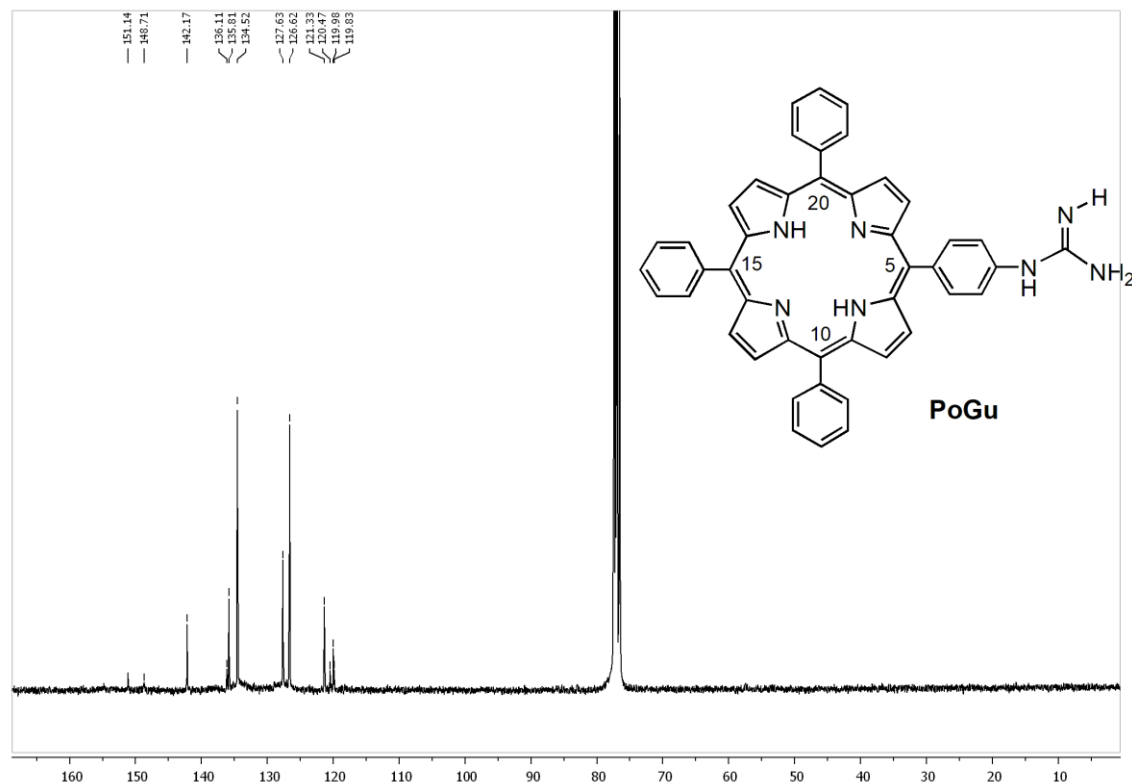

Figure S2.  $^{13}\text{C}$  NMR (75 MHz,  $\text{CDCl}_3$ ) spectrum of **PoGU**

### III. Physico-chemical properties of buffered solution (sodium cacodylate pH=7)

#### *Solubility*

**NGU**, **AGU**, **PyGU** and **PoGU** are soluble in dimethyl sulfoxide ( $c = 2 \times 10^{-3} \text{ mol dm}^{-3}$ ). Stock solutions were diluted with buffer sodium cacodylate (pH = 7.0,  $I = 0.05 \text{ mol dm}^{-3}$ ).

#### *UV/Vis spectra, stability*

Buffered solutions of studied compounds were stable for more (1 or 4) days. The absorbancies of buffered solutions of studied compounds are proportional to their concentrations up to  $c = 6 \times 10^{-6} \text{ mol dm}^{-3}$ .

No significant changes of the UV/Vis spectra on the temperature increase up to 90 °C were observed, and reproducibility of UV/Vis spectra upon cooling back to 20 °C was excellent.

All mentioned is indicating that the studied compounds do not aggregate by intermolecular stacking at experimental conditions used. Exception is **PoGU**, which indicate some aggregation upon heating to 90 °C and cooling back to 20 °C (see Figure S3.).

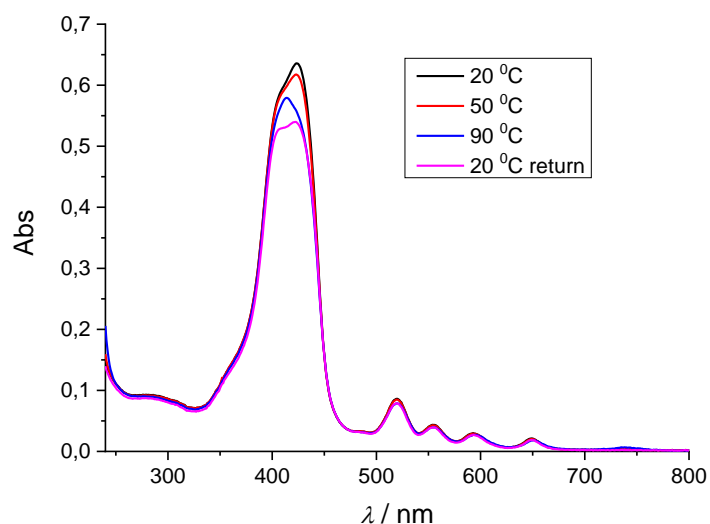

Figure S3. UV/Vis spectra changes of **PoGU** ( $c = 6 \times 10^{-6} \text{ mol dm}^{-3}$ ) in buffered solution ( $\text{pH} = 7.0$ ,  $I = 0.05 \text{ mol dm}^{-3}$ ) at different temperatures.

Absorption maxima and corresponding molar extinction coefficients ( $\epsilon$ ) are given in Table 1.

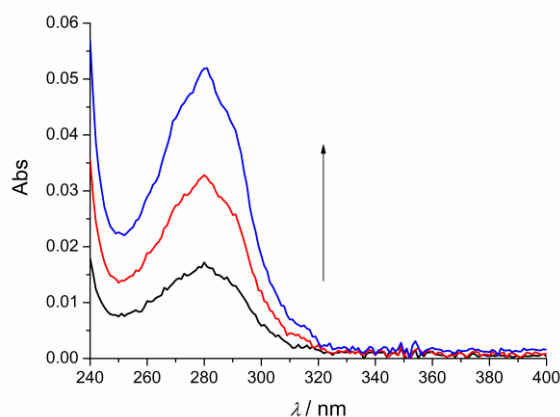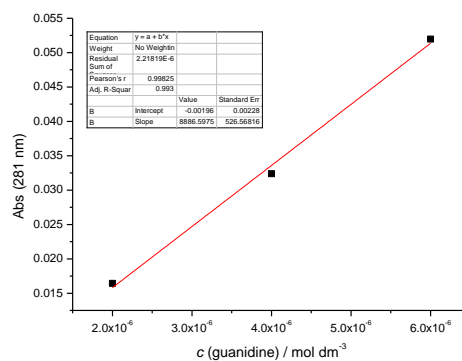

**NGU**

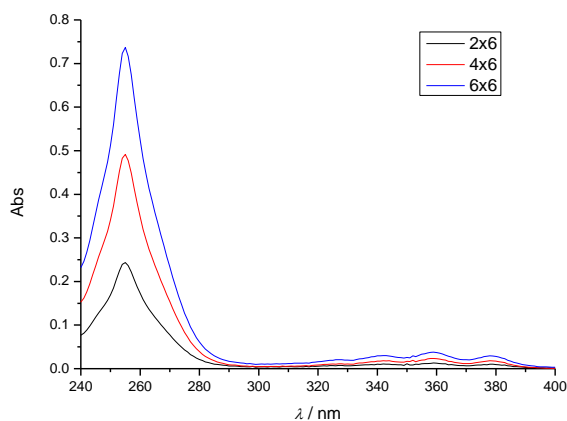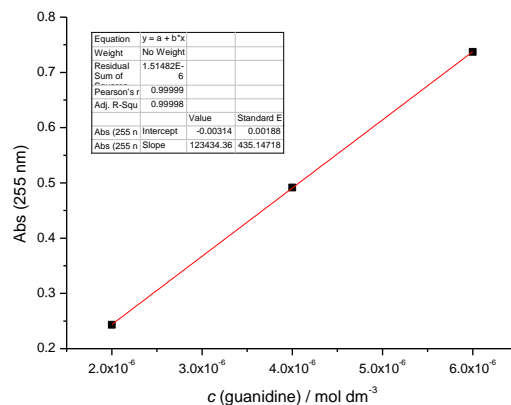

**AGU**

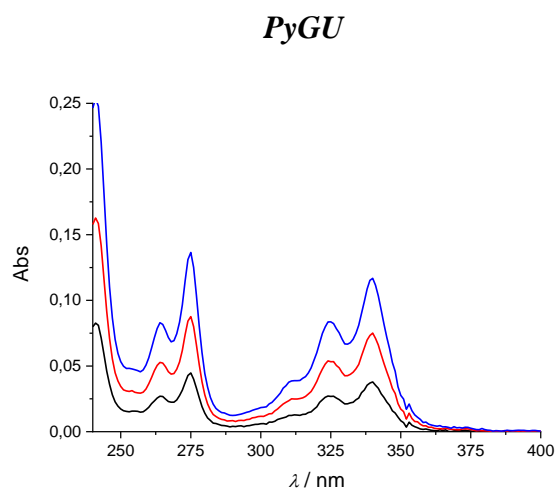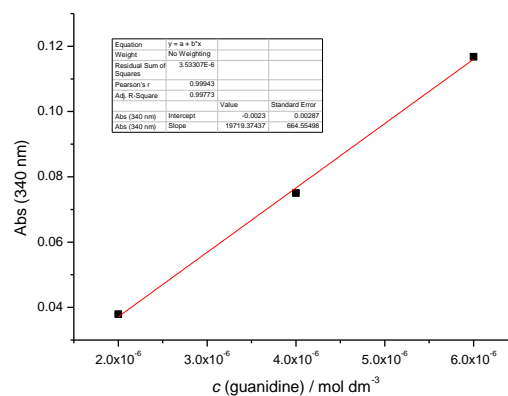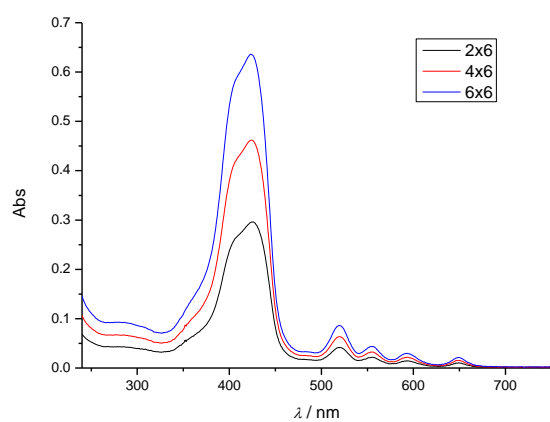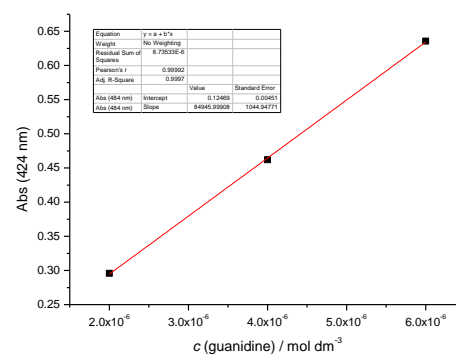

## PoGU

Figure S4. UV/Vis spectra dependence of **NGU**, **AGU**, **PyGU** and **PoGU** on compound concentrations (range  $2 \times 10^{-6}$ –  $6 \times 10^{-6}$  mol dm<sup>-3</sup>) in buffered solution (Na cacodylate, pH = 7.0,  $I = 0.05$  mol dm<sup>-3</sup>).



**Table S1.** Electronic absorption data of **NGU**, **AGU**, **PyGU** and **PoGU**.

|                                                                                                                                                                                            | $\lambda_{\text{max}}/\text{nm}$ | $\varepsilon \times 10^3 / \text{mmol}^{-1} \text{ cm}^2$ |
|--------------------------------------------------------------------------------------------------------------------------------------------------------------------------------------------|----------------------------------|-----------------------------------------------------------|
| <div>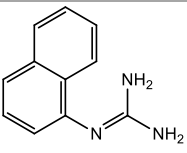<br/>Molecular Weight: 185.2251<br/><b>N-(naphthalene-1-yl)guanidine</b></div>                       | 281                              | $8.9 \pm 0.5$                                             |
| <div><br/>Molecular Weight: 235.2838<br/><b>N-(anthracene-2-yl)guanidine</b></div>                        | 255                              | $123.4 \pm 0.4$                                           |
| <div><br/>Molecular Weight: 259.3052<br/><b>N-(pyrene-1-yl)guanidine</b></div>                            | 340                              | $19.7 \pm 0.6$                                            |
| <div><br/>Molecular Weight: 671.7904<br/><b>5-(p-guanidinophenyl)-10,15,20-triphenylporphyrin</b></div> | 424                              | $84.9 \pm 1.0$                                            |

Stock solutions of **NGU**, **AGU**, **PyGU** and **PoGU** compounds were prepared in dimethyl sulfoxide ( $c = 2 \times 10^{-3} \text{ mol dm}^{-3}$ ).

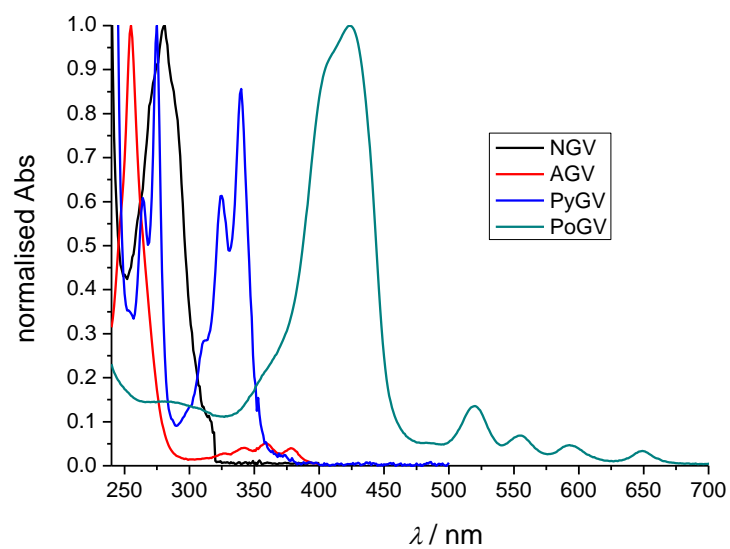

Figure S5. The UV/Vis spectra of studied compounds normalised on  $\lambda_{\max}$  for each compound,  $c = 6 \times 10^{-6}$  mol dm<sup>-3</sup> in buffered solution (Na cacodylate, pH = 7.0,  $I = 0.05$  mol dm<sup>-3</sup>).

## *pK* determination

### ***N*-(pyrene-1-yl)guanidine**

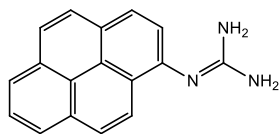

Molecular Weight: 259.3052

as a model compound for all, due to convenient chromophore

Stock solution of **PyGU** was prepared in dimethyl sulfoxide ( $c = 2 \times 10^{-3} \text{ mol dm}^{-3}$ ).

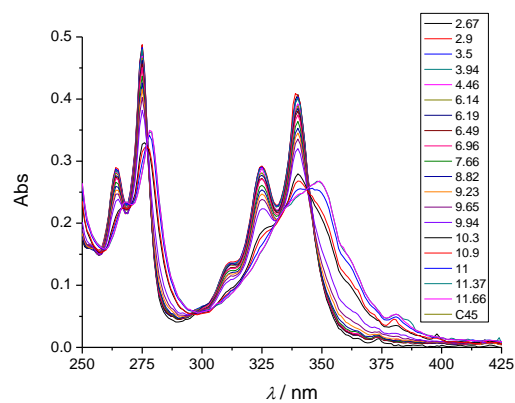

a)

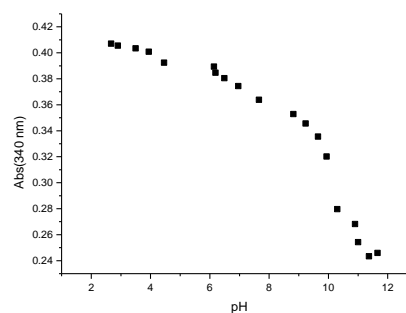

b)

Figure S6. a) UV/Vis titration of water solution of **PyGU** ( $c = 5 \times 10^{-6} \text{ mol dm}^{-3}$ ), acidified with HCl ( $0.1 \text{ mol dm}^{-3}$ ), with NaOH ( $0.2 \text{ mol dm}^{-3}$ ); b) dependence of absorbance at  $\lambda_{\text{max}} = 340 \text{ nm}$  on pH.

#### IV. Study of interactions of NGU, AGU, PyGU and PoGU with DNA and RNA in buffered solution (sodium cacodylate pH = 7)

##### *Thermal melting experiments*

It is well known that upon heating ds-helices of polynucleotides at well-defined temperature ( $T_m$  value) dissociate into two single stranded polynucleotides. Non-covalent binding of small molecules to ds-polynucleotides usually has certain effect on the thermal stability of helices thus giving different  $T_m$  values. Difference between  $T_m$  value of free polynucleotide and complex with small molecule ( $\Delta T_m$  value) is important factor in characterisation of small molecule / ds-polynucleotide interactions.

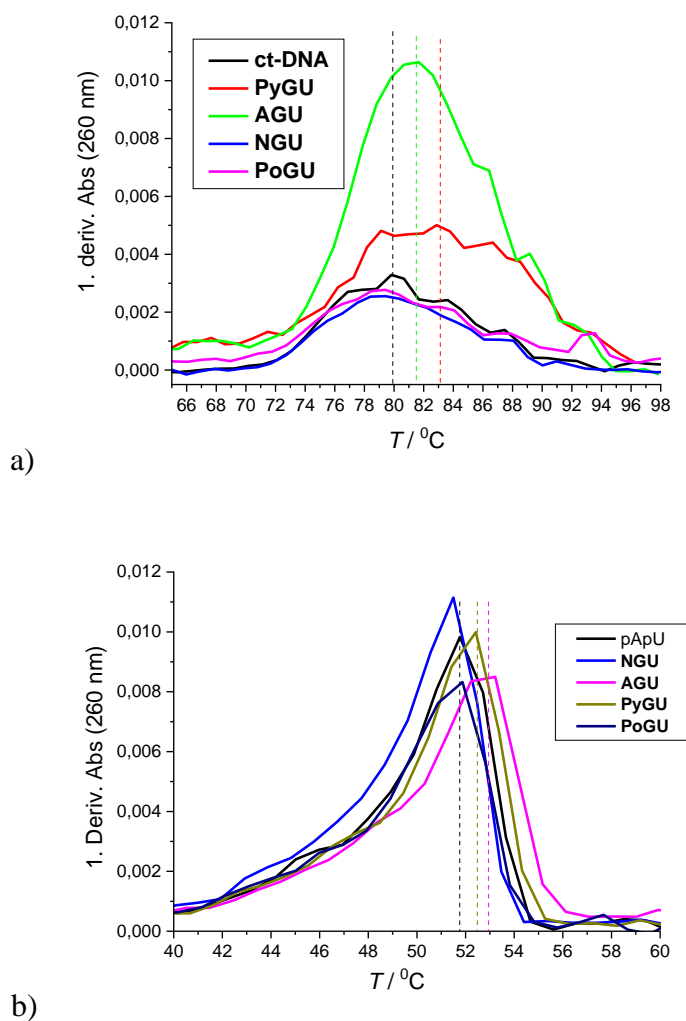

Figure S7. a) Melting curves of ct-DNA upon addition of NGU, AGU, PyGU and PoGU ( $r = 0.2$  [compound] / [polynucleotide]) at pH = 7.0 (buffer sodium cacodylate,  $I = 0.05 \text{ mol dm}^{-3}$ ) b) Melting curves of polyA-polyU upon addition of NGU, AGU, PyGU and PoGU ( $r = 0.2$  [compound] / [polynucleotide]) at pH = 7.0 (buffer sodium cacodylate,  $I = 0.05 \text{ mol dm}^{-3}$ ).

**N-(anthracene-2-yl)guanidine (AGU)**

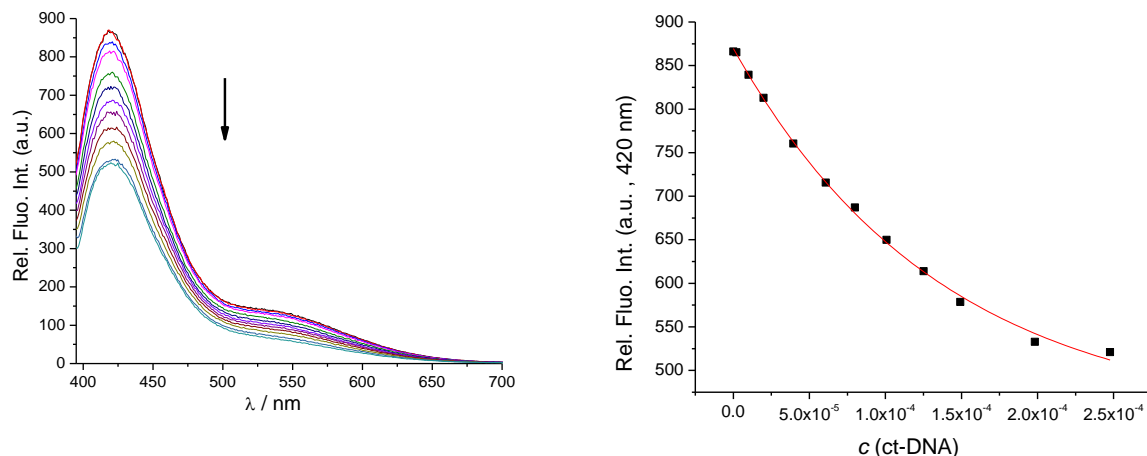

Figure S8. Fluorimetric titration of **AGU** ( $c = 1 \times 10^{-6} \text{ mol dm}^{-3}$ ;  $\lambda_{\text{exc}} = 380 \text{ nm}$ ) with **ct-DNA**. RIGHT: dependence of fluorescence at  $\lambda_{\text{max}} = 420 \text{ nm}$  on  $c(\text{DNA})$ , red line is non-linear least square fitting of Scatchard eq. (McGhee, vonHippel formalism) on experimental data. Done at  $\text{pH} = 7$ , sodium cacodylate buffer,  $I = 0.05 \text{ mol dm}^{-3}$ .

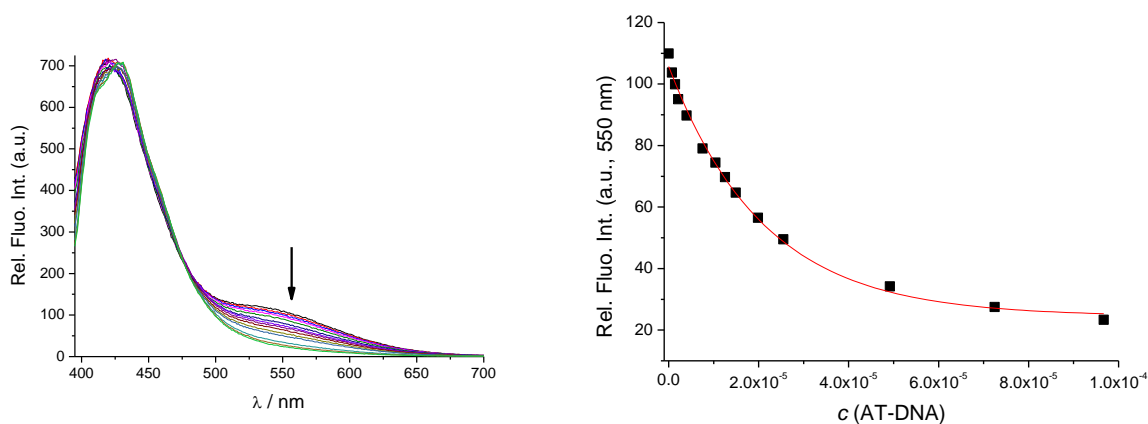

Figure S9. Fluorimetric titration of **AGU** ( $c = 1 \times 10^{-6} \text{ mol dm}^{-3}$ ;  $\lambda_{\text{exc}} = 380 \text{ nm}$ ) with **p(dAdT)<sub>2</sub>**. RIGHT: dependence of fluorescence at  $\lambda_{\text{max}} = 550 \text{ nm}$  on  $c(\text{DNA})$ , red line is non-linear least square fitting of Scatchard eq. (McGhee, vonHippel formalism) on experimental data. Done at  $\text{pH} = 7$ , sodium cacodylate buffer,  $I = 0.05 \text{ mol dm}^{-3}$ .

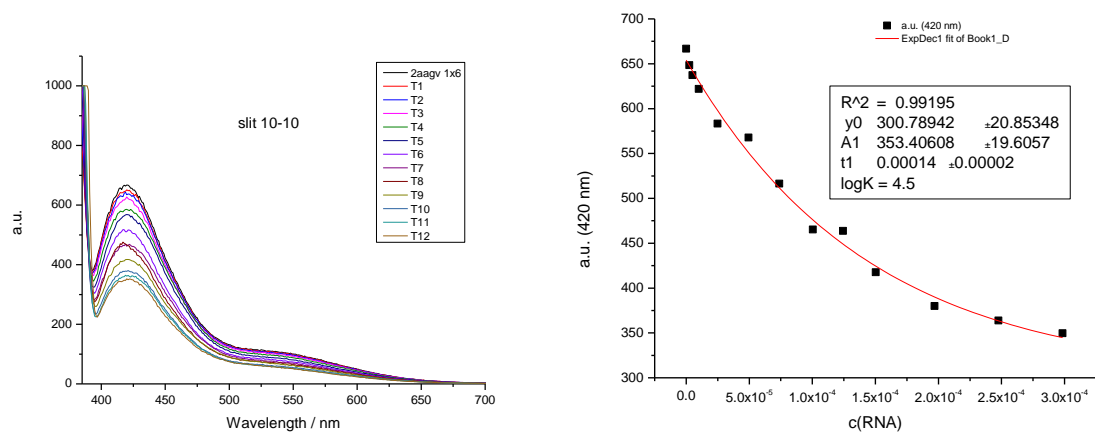

Figure S10. Fluorimetric titration of **AGU** ( $c = 1 \times 10^{-6}$  mol dm $^{-3}$ ;  $\lambda_{\text{exc}} = 380$  nm) with **poly A - poly U**. RIGHT: dependence of fluorescence at  $\lambda_{\max} = 420$  nm on  $c(\text{RNA})$ , red line is non-linear least square fitting of Scatchard eq. (McGhee, vonHippel formalism) on experimental data. Done at pH = 7, sodium cacodylate buffer,  $I = 0.05$  mol dm $^{-3}$ .

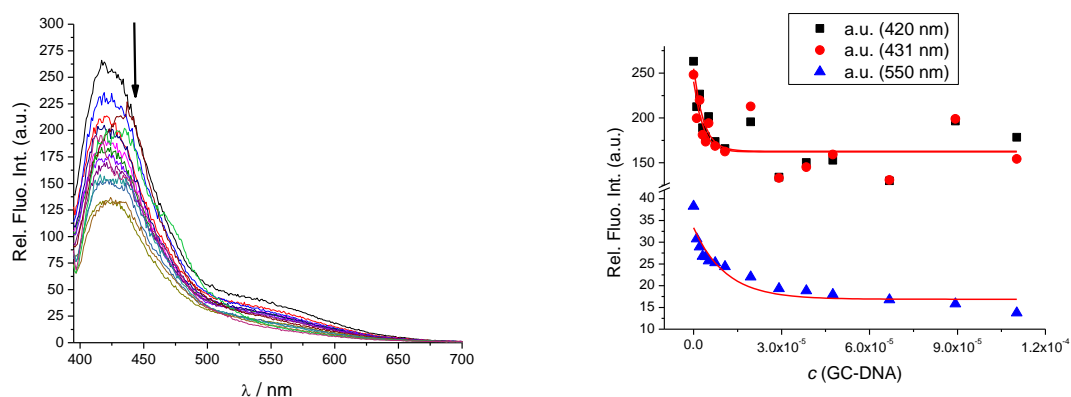

Figure S11. Fluorimetric titration of **AGU** ( $c = 1 \times 10^{-6}$  mol dm $^{-3}$ ;  $\lambda_{\text{exc}} = 380$  nm) with **GC-DNA**. RIGHT: dependence of fluorescence at  $\lambda_{\max} = 420$  nm on  $c(\text{DNA})$ . **Too small** changes did not allow accumulation of enough data points for accurate analysis by Scatchard eq. Done at pH = 7, sodium cacodylate buffer,  $I = 0.05$  mol dm $^{-3}$ .

## ***N*-(pyrene-1-yl)guanidine (PyGU)**

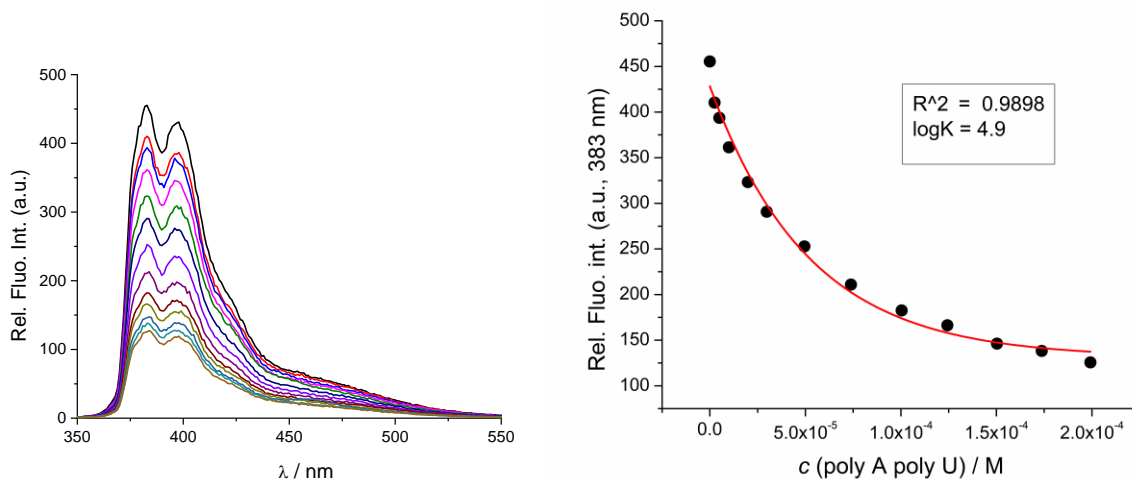

Figure S12. Fluorimetric titration of **PyGU** ( $c = 1 \times 10^{-6} \text{ mol dm}^{-3}$ ;  $\lambda_{\text{exc}} = 340 \text{ nm}$ ) with **poly A - poly U**. RIGHT: dependence of fluorescence at  $\lambda_{\text{max}} = 383 \text{ nm}$  on  $c(\text{RNA})$ , red line is non-linear least square fitting of Scatchard eq. (McGhee, vonHippel formalism) on experimental data. Done at pH = 7, sodium cacodylate buffer,  $I = 0.05 \text{ mol dm}^{-3}$ .

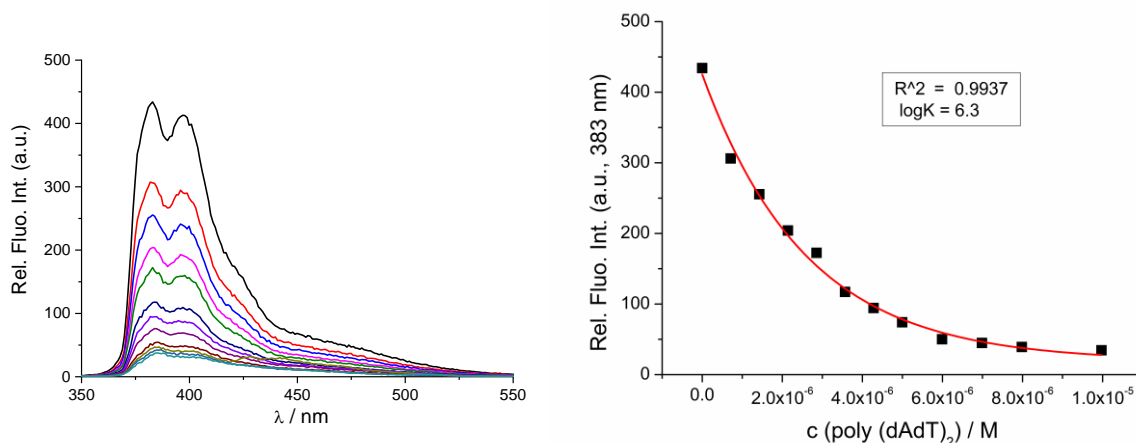

Figure S13. Fluorimetric titration of **PyGU** ( $c = 1 \times 10^{-6} \text{ mol dm}^{-3}$ ;  $\lambda_{\text{exc}} = 340 \text{ nm}$ ) with **poly (dAdT)<sub>2</sub>**. RIGHT: dependence of fluorescence at  $\lambda_{\text{max}} = 383 \text{ nm}$  on  $c(\text{DNA})$ , red line is non-linear least square fitting of Scatchard eq. (McGhee, vonHippel formalism) on experimental data. Done at pH = 7, sodium cacodylate buffer,  $I = 0.05 \text{ mol dm}^{-3}$ .

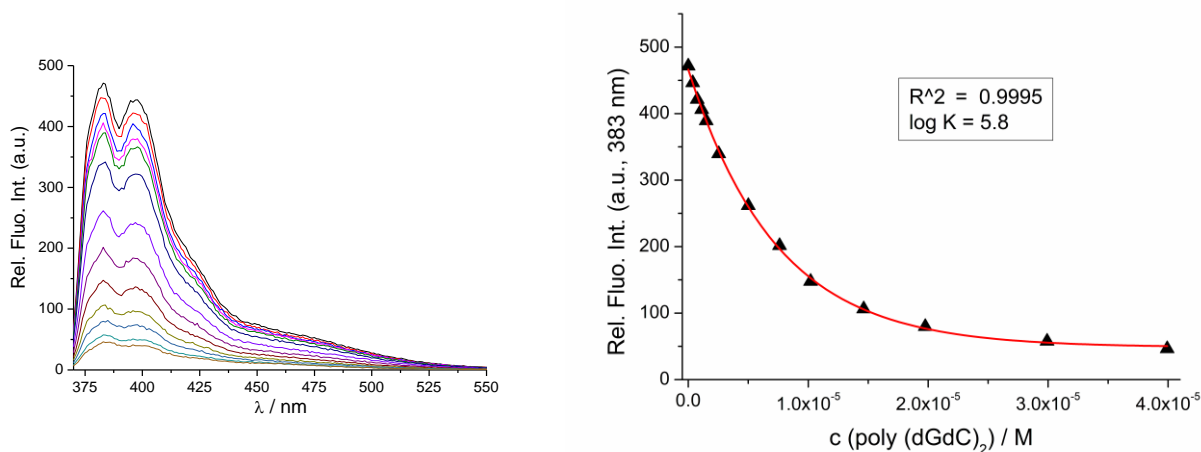

Figure S14. Fluorimetric titration of **PyGU** ( $c = 1 \times 10^{-6} \text{ mol dm}^{-3}$ ;  $\lambda_{\text{exc}} = 340 \text{ nm}$ ) with poly (dGdC)<sub>2</sub>. RIGHT: dependence of fluorescence at  $\lambda_{\text{max}} = 383 \text{ nm}$  on  $c(\text{DNA})$ , red line is non-linear least square fitting of Scatchard eq. (McGhee, vonHippel formalism) on experimental data. Done at pH = 7, sodium cacodylate buffer,  $I = 0.05 \text{ mol dm}^{-3}$ .

### 5-(*p*-guanidinophenyl)-10,15,20-triphenylporphyrin (PoGU)

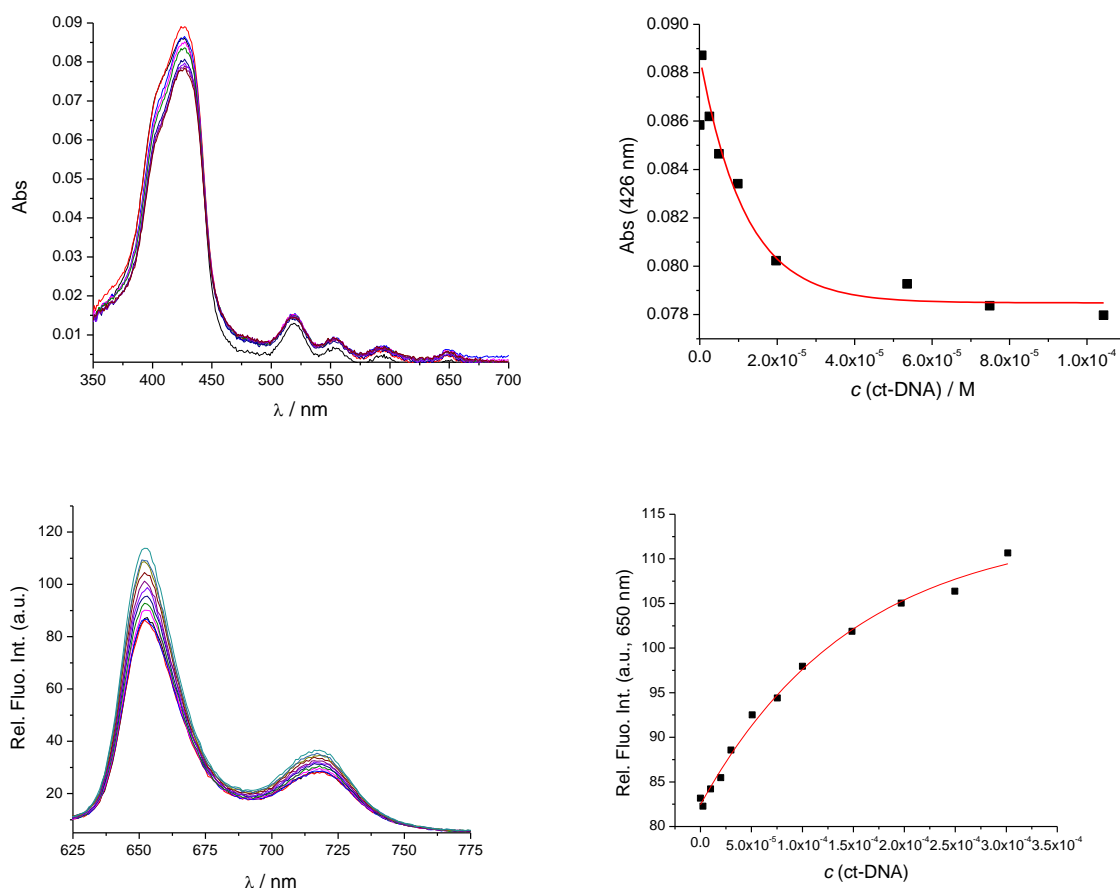

Figure S15. UV/vis and fluorimetric titration of **PoGU** ( $c = 1 \times 10^{-6} \text{ mol dm}^{-3}$ ;  $\lambda_{\text{exc}} = 420 \text{ nm}$ ) with ct-DNA. RIGHT: dependence of fluorescence at  $\lambda_{\text{max}} = 650 \text{ nm}$  on  $c(\text{DNA})$ , red line is non-linear least square fitting of Scatchard eq. (McGhee, vonHippel formalism) on experimental data. Done at pH = 7, sodium cacodylate buffer,  $I = 0.05 \text{ mol dm}^{-3}$ .



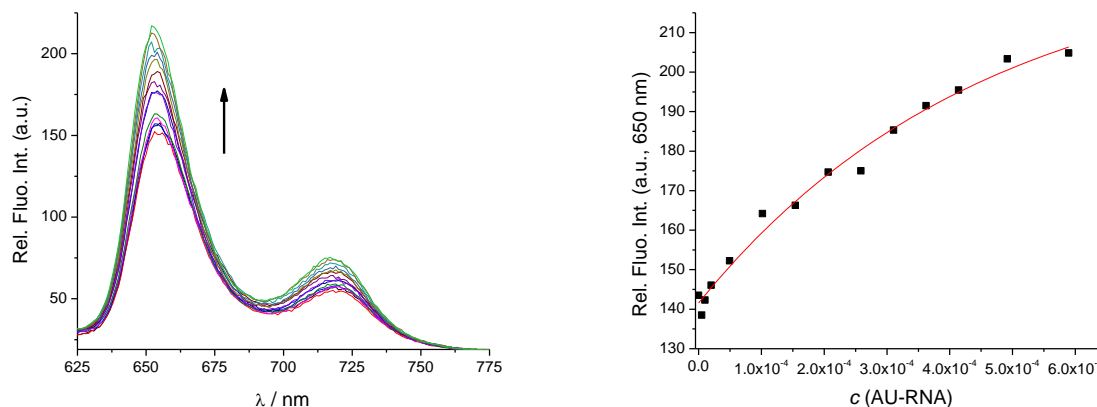

Figure S16. Fluorimetric titration of **PoGU** ( $c = 1 \times 10^{-6} \text{ mol dm}^{-3}$ ;  $\lambda_{\text{exc}} = 420 \text{ nm}$ ) with poly A - poly U. RIGHT: dependence of fluorescence at  $\lambda_{\text{max}} = 650 \text{ nm}$  on  $c(\text{RNA})$ , red line is non-linear least square fitting of Scatchard eq. (McGhee, vonHippel formalism) on experimental data. Done at pH = 7, sodium cacodylate buffer,  $I = 0.05 \text{ mol dm}^{-3}$ .

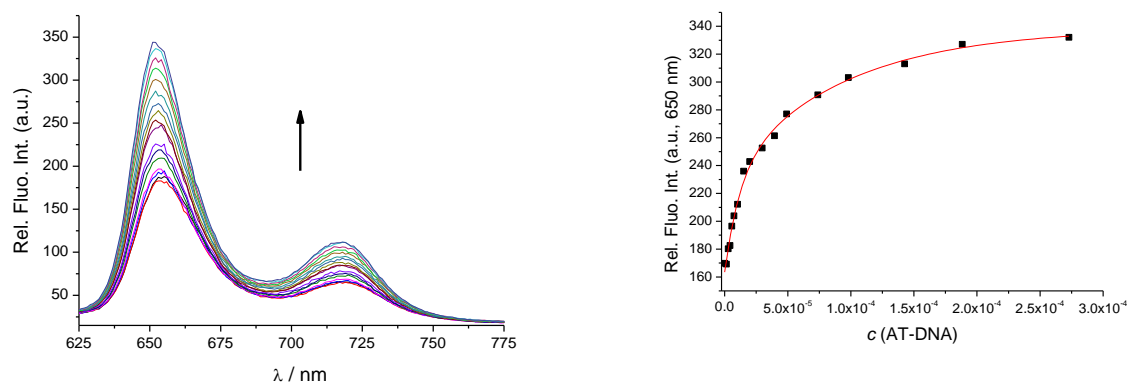

Figure S17. Fluorimetric titration of **PoGU** ( $c = 1 \times 10^{-6} \text{ mol dm}^{-3}$ ;  $\lambda_{\text{exc}} = 420 \text{ nm}$ ) with  $\text{p(dAdT)}_2$ . RIGHT: dependence of fluorescence at  $\lambda_{\text{max}} = 650 \text{ nm}$  on  $c(\text{DNA})$ , red line is non-linear least square fitting of Scatchard eq. (McGhee, vonHippel formalism) on experimental data. Done at pH = 7, sodium cacodylate buffer,  $I = 0.05 \text{ mol dm}^{-3}$ .

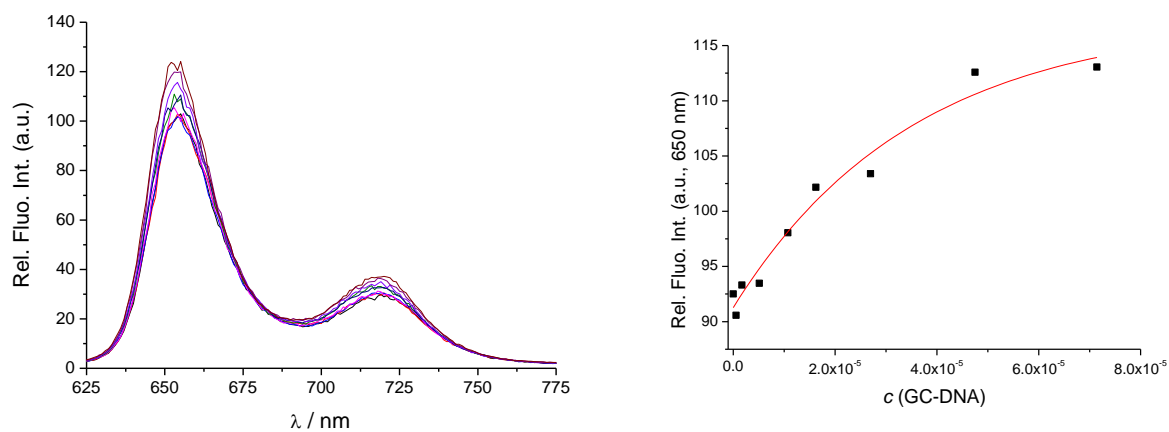

Figure S18. Fluorimetric titration of **PoGU** ( $c = 1 \times 10^{-6} \text{ mol dm}^{-3}$ ;  $\lambda_{\text{exc}} = 420 \text{ nm}$ ) with **GC-DNA**. RIGHT: dependence of fluorescence at  $\lambda_{\text{max}} = 650 \text{ nm}$  on  $c(\text{DNA})$ , red line is non-linear least square fitting of Scatchard eq. (McGhee, vonHippel formalism) on experimental data. Done at  $\text{pH} = 7$ , sodium cacodylate buffer,  $I = 0.05 \text{ mol dm}^{-3}$ .

## Circular dichroism (CD) experiments

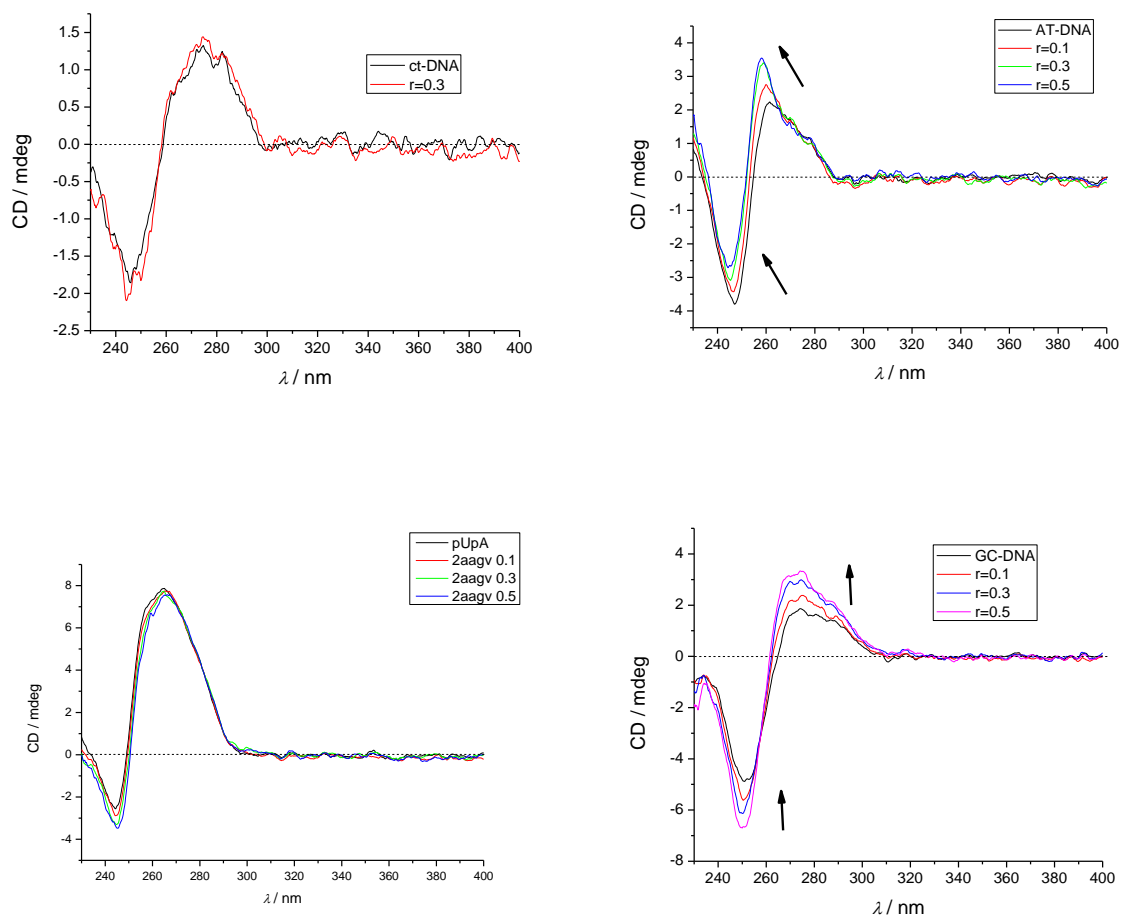

Figure S19. CD titration of ct-DNA, p(dAdT)<sub>2</sub>, poly A - poly U and GC-DNA (all DNA and RNA  $c = 2 \times 10^{-5}$  mol dm<sup>-3</sup>) with **AGU** at molar ratios  $r$  [AGU] / [polynucleotide] = 0.1 - 0.5. Done at pH = 7, sodium cacodylate buffer,  $I = 0.05$  mol dm<sup>-3</sup>.

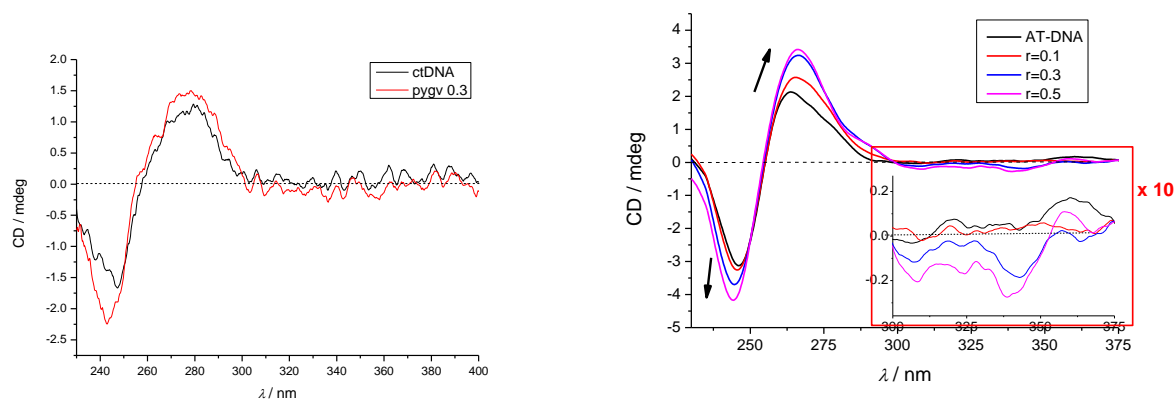

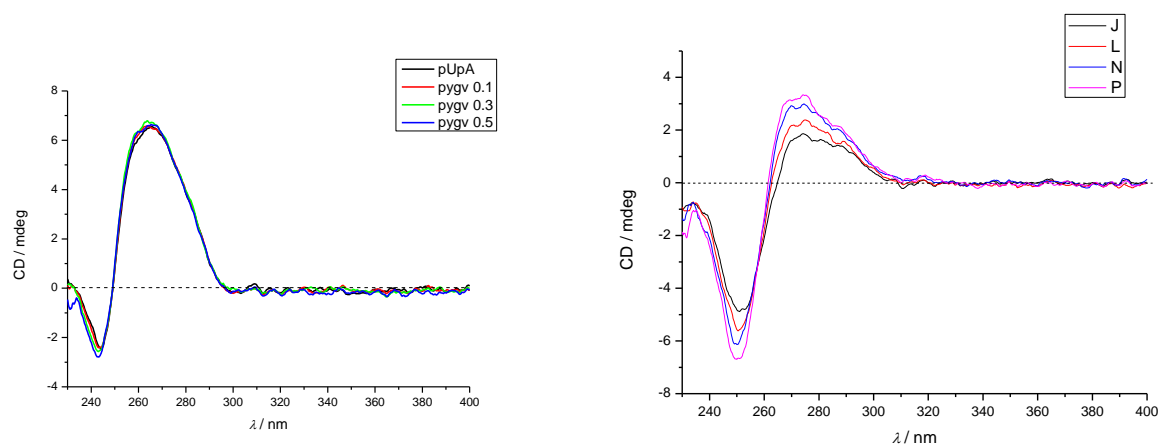

Figure S20. CD titration of ct-DNA, p(dAdT)<sub>2</sub>, poly A - poly U and GC-DNA (all DNA and RNA  $c = 2 \times 10^{-5} \text{ mol dm}^{-3}$ ) with **PyGU** at molar ratios  $r$   $[PyGU] / [\text{polynucleotide}] = 0.1 - 0.5$ . Done at pH = 7, sodium cacodylate buffer,  $I = 0.05 \text{ mol dm}^{-3}$ .

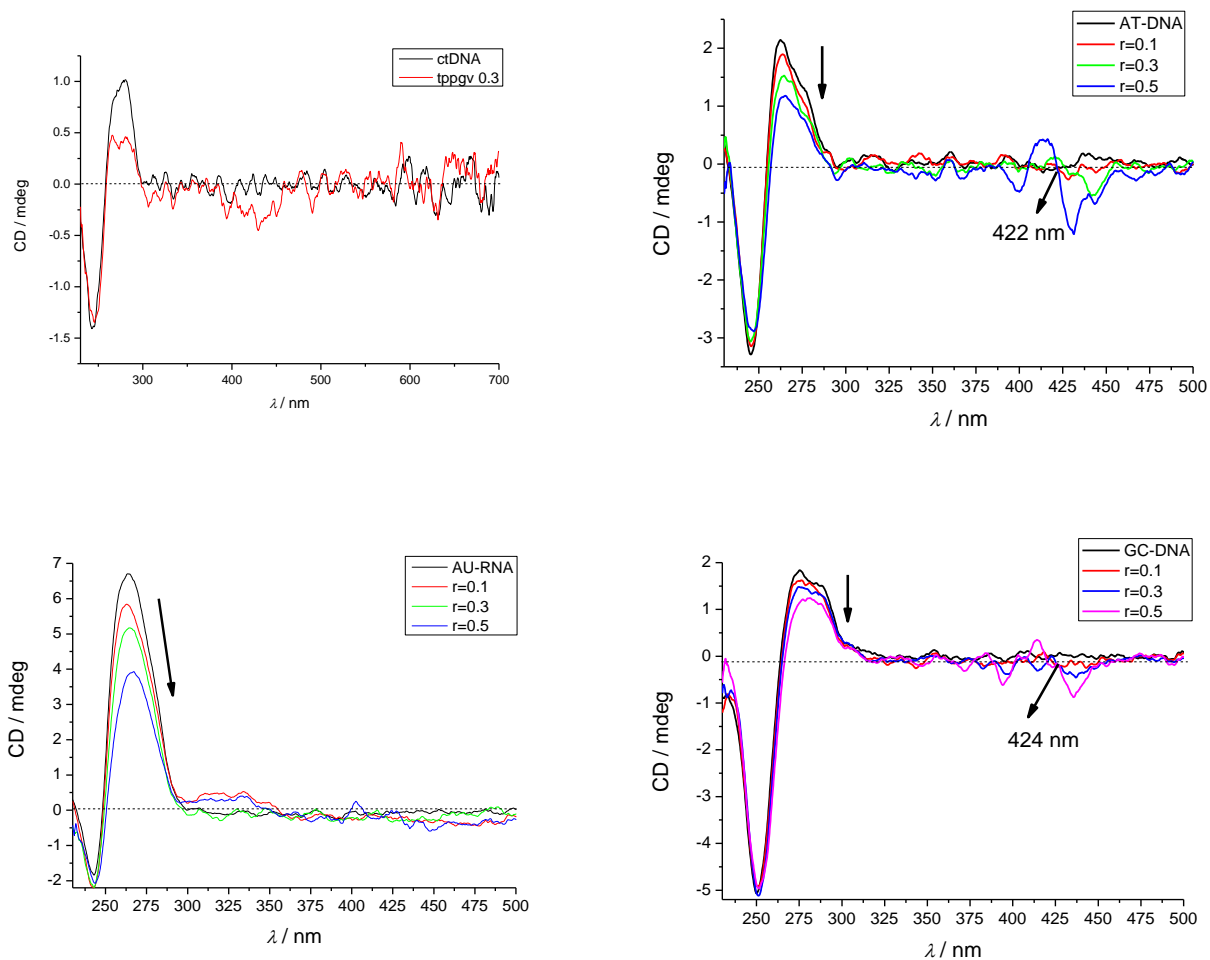

Figure S21. CD titration of ct-DNA, p(dAdT)<sub>2</sub>, poly A - poly U and GC-DNA (all DNA and RNA  $c = 2 \times 10^{-5} \text{ mol dm}^{-3}$ ) with **PoGU** at molar ratios  $r$  [**PoGU**] / [polynucleotide] = 0.1 - 0.5. Done at pH = 7, sodium cacodylate buffer,  $I = 0.05 \text{ mol dm}^{-3}$ .

## V. Additional information

**Table S2:** Groove widths and depths for selected nucleic acid conformations. Note (marked red) the drastic differences in minor groove dimensions between alternating ((dAdT)<sub>n</sub>, (dGdC)<sub>n</sub>) and homo-DNA (d(A)<sub>n</sub>d(T)<sub>n</sub>), as well as major groove of ds-RNA.<sup>5</sup>

| Structure type                          | Groove width [Å] |            | Groove depth [Å] |       |
|-----------------------------------------|------------------|------------|------------------|-------|
|                                         | major            | minor      | major            | minor |
| <b>RNA A<sub>n</sub>U<sub>n</sub></b>   | <b>3.8</b>       | 10.9       | 13.5             | 2.8   |
| <b><sup>a</sup>B-DNA</b>                | 11.7             | <b>5.7</b> | 8.5              | 7.5   |
| <b>(dGdC)<sub>n</sub></b>               | 13.5             | <b>9.5</b> | 10.0             | 7.2   |
| <b>(dAdT)<sub>n</sub></b>               | 11.2             | <b>6.3</b> | -                | -     |
| <b>d(A)<sub>n</sub>d(T)<sub>n</sub></b> | 11.4             | <b>3.3</b> | -                | -     |

<sup>a</sup>For instance ct-DNA

Supp. Info. References:

1. M. Đud, Z. Glasovac, D. Margetić, Tetrahedron 2019, 75, 109-115.
2. A. D. Adler, F. R. Longo, J. D. Finarelli, J. Goldmacher, J. Assour, L. Korsakoff, J. Org. Chem. 1967, 32, 476-476.
3. R. Luguay, L. Jaquinod, F. R. Fronczek, M. G. H. Vicente, K. M. Smith, Tetrahedron 2004, 60, 2757-2763.
4. K. Feichtinger, C. Zapf, H. L. Sings, M. Goodman, J. Org. Chem. 1998, 63, 3804-3805.
5. M. Egli, W. Saenger, Principles of Nucleic Acid Structure, Springer-Verlag, New York, 1983; Cantor, C. R., Schimmel, P. R. Biophysical Chemistry, Vol. 3, WH Freeman and Co., San Francisco 1980.
